# Supplementary material for: Computational characterization of a mechanism for the copper-catalyzed aerobic oxidative trifluoromethylation of terminal alkynes
Source: Royal Society of Chemistry journal article supplement (doi:10.1039/c3cc44648d), 2013-01-01
Supplement: c3cc44648d.pdf [file c3cc44648d.pdf]

## Supporting Information

Computational characterization of a mechanism for the copper-catalyzed aerobic oxidative trifluoromethylation of terminal alkynes

*Jesús Jover and Feliu Maseras*

| <b>Table of contents</b>                                                                                                    | <b>Page</b> |
|-----------------------------------------------------------------------------------------------------------------------------|-------------|
| Computational details                                                                                                       | S2          |
| Alternative pathways to form the Cu-CF <sub>3</sub> bond                                                                    | S3          |
| Alternative pathway for aerobic oxidation of (phen)Cu(CF <sub>3</sub> )alkynyl                                              | S5          |
| Table S1. Computed free energy values and dispersion corrections terms for all the species involved in the catalytic cycles | S6          |
| Optimized geometries                                                                                                        | S7          |

## Computational details

All the structures have been fully optimized in N,N-dimethylformamide using the Gaussian09 package,<sup>1</sup> with the PBE density functional.<sup>2,3</sup> The standard 6-31+G(d)<sup>4-6</sup> basis set was used for all H, B, C, N, O and F atoms; the Stuttgart triple zeta basis set (SDD),<sup>7,8</sup> along with the associated ECP to describe the 10 core electron, was employed for Cu. Solvation free energies are computed with the (IEF-PCM) continuum dielectric solvation model<sup>9,10</sup> using the radii and non-electrostatic terms for Truhlar and coworkers' SMD solvation model.<sup>11</sup> In all cases frequency calculations were carried out to ensure the nature of stationary points and transition states, and allowing the calculation of free energies at 25°C for all the species involved in the catalytic cycles.

Additional single point calculations on the previously optimized geometries were employed to obtain improved solvated free energy values with larger basis sets. The the aug-cc-pVTZ basis set including polarization and the associated electron core potential<sup>12</sup> was employed for Cu while the 6-311+G\*\* all-electron basis set<sup>5</sup> was used for all the other atoms.

The empirical dispersion terms, included in the calculation of free energies, were computed for the optimized geometries using the DFT-D3 package<sup>13</sup> of Grimme using the corresponding PBE-D<sup>14-16</sup> functional.

Unless otherwise stated all the free energy values correspond to those obtained with the large basis set including solvation and dispersion corrections.

Along the reaction pathways mononuclear and dinuclear species coexist, it is not easy to assign a unique origin of energies for both species at the same time since for the latter that spot would correspond to two separated monomers and hence the energy for the dinuclear species would be "doubled". Throughout the paper all the energies have been calculated regarding to the mononuclear starting copper complex.

1. M. J. Frisch, G. W. Trucks, H. B. Schlegel, G. E. Scuseria, M. A. Robb, J. R. Cheeseman, G. Scalmani, V. Barone, B. Mennucci, G. A. Petersson, H. Nakatsuji, M. Caricato, X. Li, H. P. Hratchian, A. F. Izmaylov, J. Bloino, G. Zheng, J. L. Sonnenberg, M. Hada, M. Ehara, K. Toyota, R. Fukuda, J. Hasegawa, M. Ishida, T. Nakajima, Y. Honda, O. Kitao, H. Nakai, T. Vreven, J. Montgomery, J. A., J. E. Peralta, F. Ogliaro, M. Bearpark, J. J. Heyd, E. Brothers, K. N. Kudin, V. N. Staroverov, R. Kobayashi, J. Normand, K. Raghavachari, A. Rendell, J. C. Burant, S. S. Iyengar, J. Tomasi, M. Cossi, N. Rega, N. J. Millam, M. Klene, J. E. Knox, J. B. Cross, V. Bakken, C. Adamo, J. Jaramillo, R. Gomperts, R. E. Stratmann, O. Yazyev, A. J. Austin, R. Cammi, C. Pomelli, J. W. Ochterski, R. L. Martin, K. Morokuma, V. G. Zakrzewski, G. A. Voth, P. Salvador, J. J. Dannenberg, S. Dapprich, A. D. Daniels, Ö. Farkas, J. B. Foresman, J. V. Ortiz and J. F. Cioslowski, D. J. , *Gaussian09, Revision A.02*, (2009) Gaussian, Inc., Wallingford CT.
2. J. P. Perdew, K. Burke and M. Ernzerhof, *Phys. Rev. Lett.*, 1996, **77**, 3865.
3. J. P. Perdew, K. Burke and M. Ernzerhof, *Phys. Rev. Lett.*, 1997, **78**, 1396.
4. P. C. Hariharan and J. A. Pople, *Theor. Chem. Acc.*, 1973, **28**, 213-222.
5. M. J. Frisch, J. A. Pople and J. S. Binkley, *J. Chem. Phys.*, 1984, **80**, 3265-3269.
6. T. Clark, J. Chandrasekhar, G. W. Spitznagel and P. V. R. Schleyer, *J. Comput. Chem.*, 1983, **4**, 294-301.
7. T. H. Dunning and P. J. Hay, in *Modern Theoretical Chemistry*, ed. H. F. Schaefer III, Plenum, New York, 1976, vol. 3, pp. 1-28.
8. A. Bergner, M. Dolg, W. Küchle, H. Stoll and H. Preuss, *Molecular Physics*, 1993, **80**, 1431 - 1441.
9. D. J. Tannor, B. Marten, R. Murphy, R. A. Friesner, D. Sitkoff, A. Nicholls, B. Honig, M. Ringnalda and W. A. Goddard, *J. Am. Chem. Soc.*, 1994, **116**, 11875-11882.
10. B. Marten, K. Kim, C. Cortis, R. A. Friesner, R. B. Murphy, M. N. Ringnalda, D. Sitkoff and B. Honig, *J. Phys. Chem.*, 1996, **100**, 11775-11788.
11. A. V. Marenich, C. J. Cramer and D. G. Truhlar, *J. Phys. Chem. B*, 2009, **113**, 6378-6396.
12. K. A. Peterson and C. Puzzarini, *Theor. Chem. Acc.*, 2005, **114**, 283-296.
13. *DFT-D3 A dispersion correction for density functionals, Hartree-Fock and semi-empirical quantum chemical methods*, (2011) Universität Bonn.
14. S. Grimme, *J. Comput. Chem.*, 2004, **25**, 1463-1473.
15. S. Grimme, *J. Comput. Chem.*, 2006, **27**, 1787-1799.
16. S. Grimme, *J. Chem. Phys.*, 2010, **132**, 154104.

### Alternative pathways to form the Cu-CF<sub>3</sub> bond

Three alternative pathways to form the Cu-CF<sub>3</sub> bond have been explored. The first one consists in the  $\sigma$ -bond metathesis between **II'** and Me<sub>3</sub>Si(CF<sub>3</sub>); the second one implies the oxidative addition of Me<sub>3</sub>Si(CF<sub>3</sub>) onto **II'** and subsequent reductive elimination of Me<sub>3</sub>SiF (Scheme S1).

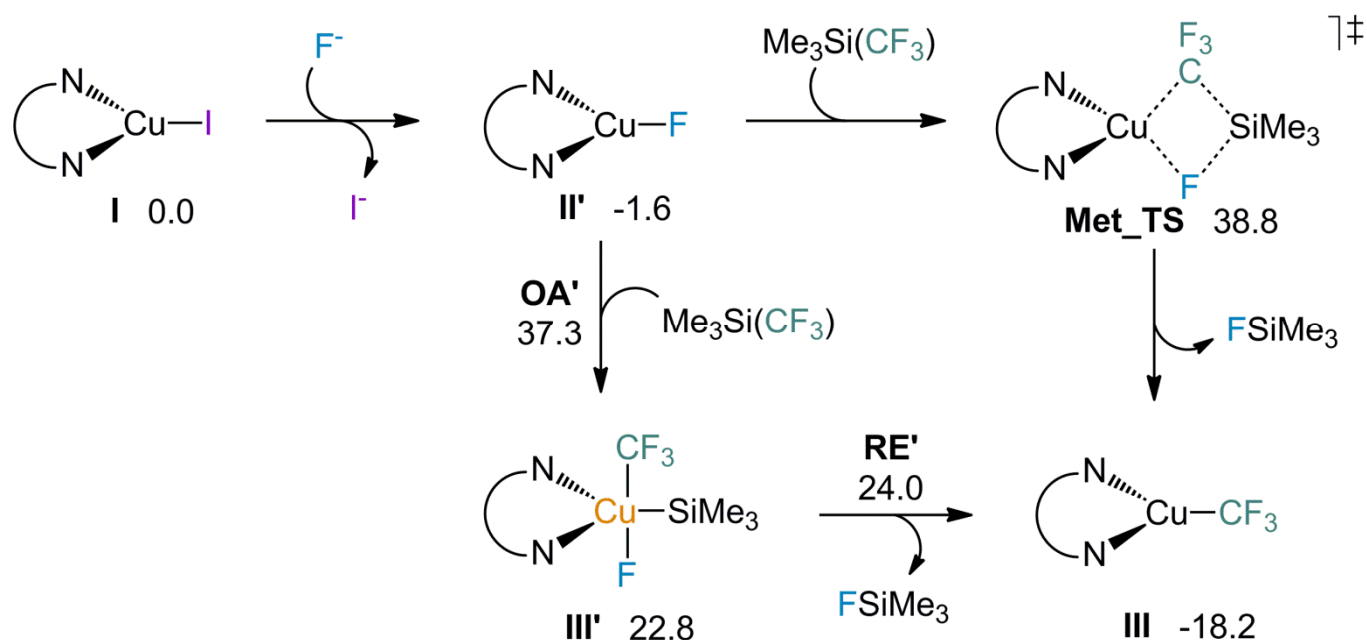

**Scheme S1.**  $\sigma$ -bond metathesis and oxidative addition/reductive elimination pathways leading to the formation of **III** (Cu(I), Cu(III)); free energies in kcal/mol).

In both pathways in Scheme S1 the reaction starts with the replacement of iodide by fluoride, this step is slightly exergonic indicating that there may not be a barrier mediating this stage. As may be observed the transition state for the  $\sigma$ -bond metathesis (**Met\_TS**) is very high in energy (40.4 kcal/mol) and, thus, this possible route can be ruled out. In the second pathway, the reaction proceeds by the oxidative addition of Me<sub>3</sub>Si(CF<sub>3</sub>) onto the copper-fluoride intermediate **II'** to yield the copper (III) complex **III'** which may, in turn, reductively eliminate Me<sub>3</sub>SiF delivering the active catalyst **II**. Unfortunately, the barrier for the oxidative addition process is very high (38.9 kcal/mol) preventing the reaction to proceed through this pathway.

The last studied pathway (Scheme S2) involves the substitution of the iodide by Me<sub>3</sub>Si(CF<sub>3</sub>)F<sup>-</sup> and direct trifluoromethyl group transfer in a S<sub>N</sub>2-like fashion, with the CF<sub>3</sub> group inverting its configuration. As may be seen the energy of the transition state is even higher (more than 100 kcal/mol) than those found previously, probably due to the unfavorable planarization of the CF<sub>3</sub> moiety.

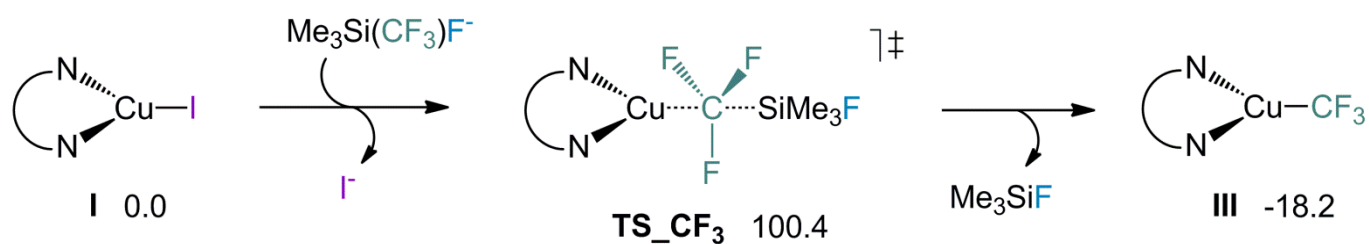

**Scheme S2.** Oxidative addition/reductive elimination pathway leading to the formation of **III** (Cu(I), Cu(III)); free energies in kcal/mol).

Additionally, the potential formation of an adduct between the  $\text{CF}_3^-$  group (obtained through the mechanism described in the main text) and a solvent molecule has been studied. However, 14.0 kcal/mol are required to bring both groups together (Scheme S3), indicating that this process is not favored.

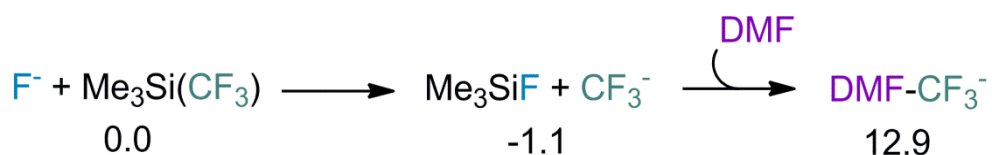

**Scheme S3.** Formation of an adduct between  $\text{CF}_3^-$  and a solvent DMF molecule (free energies in kcal/mol).

### Alternative pathway for aerobic oxidation of (phen)Cu(CF<sub>3</sub>)alkynyl

An alternative pathway for the aerobic oxidation was computed (Scheme S4); this process implies the addition of O<sub>2</sub> to the hypothetical (phen)Cu(CF<sub>3</sub>)alkynyl species **IV'** (generated by the deprotonation of a Cu-coordinated terminal alkyne) to deliver the intermediate **V'**. This latter compound seems to be, in principle, a copper (II) complex since the O–O distance has been elongated to 1.34 Å, corresponding to a superoxo ligand and thus indicating that just one electron has been transferred from the metal to the O<sub>2</sub> moiety. As may be seen, the aerobic oxidation of **IV'** is not very high (16.1 kcal/mol) but affords a copper (II) intermediate which does not allow to reductively eliminate the product and recover the starting copper (I) catalyst. In addition, if the reductive elimination was possible, the barrier should be added to the one mediating the transformation between **IV'** and **V'**, surely affording an overall energy barrier higher than the one proposed in the main text.

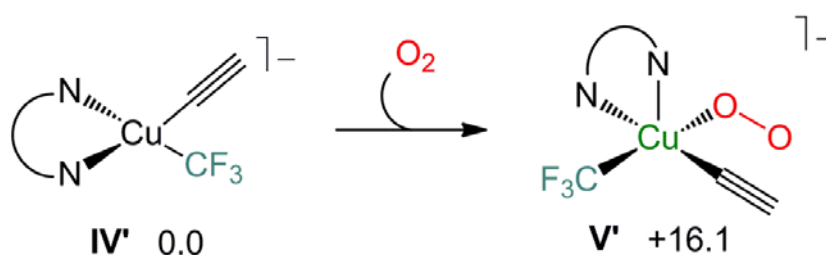

**Scheme S4.** Aerobic oxidation of the hypothetical (phen)Cu(CF<sub>3</sub>)alkynyl species (Cu(I), Cu(II); free energies in kcal/mol relative to **IV'**).

**Table S1.** Computed free energy values and dispersion corrections terms for all the species involved in the catalytic cycles (in Hartrees).

| Species                                             | Free energy  | Dispersion correction |
|-----------------------------------------------------|--------------|-----------------------|
| PhCCH                                               | -307.999059  | -0.004231             |
| Me <sub>3</sub> Si(CF <sub>3</sub> )                | -746.330805  | -0.006246             |
| F <sup>-</sup>                                      | -99.944342   | 0.000000              |
| Me <sub>3</sub> Si(CF <sub>3</sub> )F <sup>-</sup>  | -846.271861  | -0.008270             |
| Me <sub>3</sub> SiF                                 | -508.748750  | -0.004001             |
| CF <sub>3</sub> <sup>-</sup>                        | -337.530141  | -0.000275             |
| PhCCCF <sub>3</sub>                                 | -644.838856  | -0.005508             |
| I <sup>-</sup>                                      | -295.894330  | 0.000000              |
| O <sub>2</sub>                                      | -150.256524  | -0.000001             |
| OH <sup>-</sup>                                     | -75.866502   | 0.000000              |
| Me <sub>3</sub> Si(CF <sub>3</sub> )OH <sup>-</sup> | -822.214906  | -0.009130             |
| Me <sub>3</sub> SiOH                                | -484.709283  | -0.004642             |
| I                                                   | -1064.117291 | -0.014071             |
| II                                                  | -1401.664839 | -0.017942             |
| III                                                 | -1105.780082 | -0.014641             |
| IV                                                  | -1256.028218 | -0.017451             |
| V                                                   | -2361.789322 | -0.039325             |
| TS_OO                                               | -2361.775066 | -0.040789             |
| VI                                                  | -2361.805644 | -0.043023             |
| VII                                                 | -2669.791641 | -0.054149             |
| DPTS1                                               | -2669.781453 | -0.056044             |
| VIII                                                | -2669.787614 | -0.057935             |
| IX                                                  | -2977.773010 | -0.073060             |
| DPTS2                                               | -2977.765689 | -0.074033             |
| X                                                   | -1488.906750 | -0.027050             |
| RETS                                                | -1488.883378 | -0.027031             |
| XI                                                  | -844.121247  | -0.013813             |
| II'                                                 | -868.170822  | -0.013093             |
| Met_TS                                              | -1614.427976 | -0.028592             |
| OA'                                                 | -1614.428823 | -0.030233             |
| III'                                                | -1614.453489 | -0.028570             |
| RE'                                                 | -1614.452180 | -0.027985             |
| TS_CF <sub>3</sub>                                  | -1614.336278 | -0.022207             |
| CF <sub>3</sub> -DMF                                | -585.725767  | -0.007862             |
| IV'                                                 | -1413.301264 | -0.022542             |
| V'                                                  | -1563.527359 | -0.027304             |

## Optimized geometries

### PhCCH

C -3.254336 0.000004 -0.000001  
H -4.333564 0.000022 0.000000  
C -2.028692 -0.000014 -0.000002  
C -0.597882 -0.000006 0.000000  
C 0.119483 -1.222938 0.000000  
C 0.119471 1.222932 0.000000  
C 1.520467 -1.216483 0.000001  
H -0.430662 -2.169618 0.000000  
C 1.520456 1.216491 0.000001  
H -0.430683 2.169607 0.000000  
C 2.225105 0.000008 0.000001  
H 2.064954 -2.167057 0.000001  
H 2.064932 2.167070 0.000001  
H 3.320595 0.000013 0.000002

### Me<sub>3</sub>Si(CF<sub>3</sub>)

Si -0.885009 0.000894 -0.000060  
C -1.392226 -0.899112 1.598736  
H -1.013644 -1.936479 1.611344  
H -1.007415 -0.377511 2.492889  
C -1.392002 1.835622 -0.020999  
H -2.493586 1.925284 -0.025572  
H -1.011879 2.365825 0.870157  
C -1.392737 -0.936013 -1.577295  
H -1.013791 -0.431643 -2.483764  
H -2.494559 -0.982371 -1.651422  
C 1.097985 -0.000038 -0.000098  
F 1.645434 0.613451 -1.112104  
F 1.643122 -1.270605 0.024394  
F 1.645644 0.655482 1.087410  
H -1.005684 2.347014 -0.920407  
H -1.009256 -1.971643 -1.569411  
H -2.493983 -0.938701 1.677663

### Me<sub>3</sub>Si(CF<sub>3</sub>)F<sup>-</sup>

C 0.866410 -0.505993 1.859158  
H -0.121394 -0.612121 2.339861  
H 1.402756 -1.466998 1.962948  
C 0.870073 1.865924 -0.500823  
H 1.274453 2.455595 0.343542  
H -0.103507 2.301102 -0.783996  
C -1.320703 -0.001215 -0.002254  
F -1.928679 0.312150 -1.229523  
F -1.911602 0.911221 0.889752  
F -1.918033 -1.224475 0.347205  
Si 0.785582 -0.000459 -0.005004  
C 0.883358 -1.362676 -1.373244  
H -0.098797 -1.686897 -1.758902  
H 1.483400 -0.995399 -2.225397  
F 2.753486 0.005706 0.013649  
H 1.566470 1.995916 -1.348426  
H 1.403533 -2.251189 -0.970547  
H 1.443568 0.248761 2.424201

### Me<sub>3</sub>SiF

C -1.639051 -0.807323 -0.526120  
H -1.721465 -0.839396 -1.628297  
H -1.709761 -1.843855 -0.150543  
C 0.118960 1.823380 -0.521092  
H -0.735473 2.402911 -0.128135  
H 0.113041 1.915818 -1.622979  
Si -0.000153 -0.000531 -0.014834  
C 1.521241 -1.012404 -0.525076  
H 1.600583 -1.054842 -1.627014  
H 2.450468 -0.558185 -0.136770

F -0.001015 -0.003665 1.708166  
H 1.052115 2.283262 -0.149138  
H 1.458015 -2.049508 -0.149663  
H -2.503141 -0.237708 -0.139546

### CF<sub>3</sub><sup>-</sup>

C -0.000207 -0.000494 0.558714  
F 0.958505 -0.853815 -0.124200  
F -1.219107 -0.402526 -0.124242  
F 0.260740 1.256670 -0.124034

### PhCCCF<sub>3</sub>

C -1.330725 0.000723 -0.003700  
C -0.105042 0.000382 0.001294  
C 1.318912 0.000190 0.001394  
C 2.029841 1.227123 0.000944  
C 2.029392 -1.227008 0.001007  
C 3.429607 1.218187 -0.000072  
H 1.477346 2.171972 0.001303  
C 3.429162 -1.218593 -0.000022  
H 1.476541 -2.171649 0.001413  
C 4.131058 -0.000333 -0.000634  
H 3.975871 2.167331 -0.000524  
H 3.975073 -2.167940 -0.000449  
H 5.226432 -0.000533 -0.001523  
C -2.775755 0.000121 -0.001317  
F -3.297845 -1.074454 -0.678625  
F -3.297658 1.125801 -0.589201  
F -3.301159 -0.051784 1.268539

### O<sub>2</sub>

O 0.000000 0.000000 0.614229  
O 0.000000 0.000000 -0.614229

### OH

O 0.000000 0.000000 0.109033  
H 0.000000 0.000000 -0.872262

### Me<sub>3</sub>Si(CF<sub>3</sub>)OH<sup>-</sup>

C -0.779942 1.937125 -0.124762  
H 0.010943 2.355708 0.522294  
H -0.543125 2.231115 -1.165041  
C -0.875341 -0.873207 1.738030  
H -1.115482 -0.140698 2.532002  
H 0.090715 -1.344283 1.991198  
C 1.333299 -0.007323 0.002794  
F 1.965030 -1.276662 0.050910  
F 1.974093 0.677294 1.068396  
F 1.939124 0.581666 -1.138019  
Si -0.911859 0.008852 0.008873  
C -0.846774 -1.126881 -1.567823  
H 0.106327 -1.668472 -1.697291  
H -1.663027 -1.873129 -1.540702  
H -1.659114 -1.652774 1.775297  
H -1.010182 -0.506540 -2.469899  
H -1.744425 2.400726 0.145645  
O -2.797519 0.170993 -0.033862  
H -3.218127 -0.712503 -0.067844

### Me<sub>3</sub>SiOH

C 0.941891 1.565409 -0.533662  
H 1.035635 1.602671 -1.635091  
H 0.419001 2.482162 -0.206068  
C 0.944798 -1.563079 -0.535164  
H 1.967074 -1.579356 -0.114487  
H 1.036342 -1.600206 -1.636788  
Si -0.004233 0.000050 0.008203

C -1.795547 -0.001332 -0.627312  
H -1.817289 -0.000467 -1.732471  
H -2.340126 -0.897072 -0.278082  
H 0.424789 -2.481081 -0.206504  
H -2.342061 0.892666 -0.276652  
H 1.963271 1.584294 -0.110913  
O -0.188322 -0.000876 1.754485  
H 0.672351 -0.003286 2.223170

### I

Cu -0.907018 -0.000017 0.079408  
N 0.657932 1.355642 0.075012  
N 0.657923 -1.355633 0.074949  
C 0.640855 2.696647 0.081264  
C 1.814909 3.478522 0.028324  
C 3.050226 2.845700 -0.032972  
C 4.337240 0.686797 -0.096593  
C 4.337237 -0.686804 -0.096577  
C 3.050215 -2.845702 -0.032930  
C 1.814894 -3.478517 0.028340  
C 0.640840 -2.696639 0.081216  
C 1.868582 0.722950 0.017706  
C 3.106327 1.427832 -0.038015  
C 3.106321 -1.427834 -0.037996  
C 1.868579 -0.722946 0.017696  
H -0.345697 3.168202 0.130092  
H 1.735446 4.568941 0.035649  
H 3.979827 3.422544 -0.076396  
H 5.277953 1.245127 -0.142628  
H 5.277949 -1.245138 -0.142596  
H 3.979815 -3.422550 -0.076323  
H 1.735427 -4.568936 0.035680  
H -0.345717 -3.168189 0.129983  
I -3.434337 0.000008 -0.052128

### II

Cu -0.775753 0.091876 0.709213  
N 0.794855 1.378206 0.087488  
N 0.782401 -1.294203 0.460457  
C 0.784616 2.706471 -0.105087  
C 1.947807 3.454302 -0.382275  
C 3.173575 2.801483 -0.464334  
C 4.439886 0.632473 -0.349558  
C 4.431681 -0.729640 -0.171620  
C 3.142508 -2.839677 0.279830  
C 1.910932 -3.434887 0.533369  
C 0.758120 -2.627544 0.618866  
C 1.994964 0.727808 0.002753  
C 3.224510 1.397742 -0.273158  
C 3.208402 -1.434909 0.102019  
C 1.987400 -0.702307 0.195507  
H -0.192146 3.196788 -0.035836  
H 1.870345 4.535200 -0.529353  
H 4.095687 3.352567 -0.676826  
H 5.375362 1.162293 -0.558262  
H 5.360325 -1.306439 -0.236459  
H 4.057816 -3.436815 0.212523  
H 1.821267 -4.516044 0.671075  
H -0.221263 -3.071698 0.825118  
C -2.148801 0.333650 2.032098  
F -1.697677 0.682494 3.320087  
F -2.965937 -0.788340 2.284620  
F -3.096057 1.341191 1.756092  
I -2.151092 -0.301815 -1.932688

### III

Cu -1.399125 -0.020370 0.090124

N 0.208197 1.339558 0.098301  
N 0.227919 -1.350215 0.096234  
C 0.173232 2.679731 0.107848  
C 1.338164 3.477861 0.043459  
C 2.582075 2.861116 -0.034872  
C 3.893018 0.710823 -0.117900  
C 3.903337 -0.664676 -0.117874  
C 2.625723 -2.834852 -0.035398  
C 1.391469 -3.470704 0.042261  
C 0.214110 -2.690956 0.105656  
C 1.425913 0.726451 0.025797  
C 2.656060 1.443208 -0.043937  
C 2.677652 -1.415976 -0.044258  
C 1.436585 -0.718260 0.025305  
H -0.818784 3.139769 0.167652  
H 1.244833 4.567855 0.054620  
H 3.503396 3.451557 -0.088368  
H 4.830181 1.275456 -0.175074  
H 4.848869 -1.215127 -0.175135  
H 3.556107 -3.410977 -0.088518  
H 1.315122 -4.562015 0.053419  
H -0.770427 -3.166698 0.164529  
C -3.302367 -0.006483 -0.068612  
F -3.880557 1.109375 -0.741763  
F -4.027557 -0.014816 1.153934  
F -3.900475 -1.094356 -0.769207

#### IV

Cu -1.269306 -0.267388 -0.029201  
O -1.043997 -1.264907 2.694105  
O -1.965036 -1.118364 1.820937  
C -3.064447 0.234494 -0.609780  
F -3.781137 1.095173 0.243102  
F -3.072827 0.932470 -1.837787  
F -3.981062 -0.810951 -0.838649  
C 1.147655 3.553797 0.313755  
C 2.437666 3.055934 0.166438  
C 0.056086 2.655188 0.297064  
H 0.963036 4.624652 0.440900  
C 2.633198 1.658930 0.003590  
H 3.305037 3.725334 0.173259  
N 0.208763 1.334342 0.147951  
H -0.972613 3.016361 0.406871  
C 3.927773 1.051433 -0.155772  
C 1.468951 0.835265 0.001923  
C 4.056262 -0.309493 -0.305713  
H 4.811607 1.698806 -0.153825  
C 1.604381 -0.594750 -0.162395  
C 2.901146 -1.167756 -0.312662  
H 5.043921 -0.767869 -0.425650  
N 0.461868 -1.345601 -0.172827  
C 2.978250 -2.576615 -0.466122  
C 0.566407 -2.674158 -0.324192  
C 1.808915 -3.328675 -0.469532  
H 3.957275 -3.054553 -0.581967  
H -0.370762 -3.239467 -0.331106  
H 1.831982 -4.415822 -0.587458

#### V

Cu 1.595978 0.676643 -0.688935  
Cu -1.596853 -0.677964 0.691224  
O -0.292030 0.154608 -0.647041  
O 0.291352 -0.156460 0.649487  
C -1.816649 -1.642161 2.388489  
C 1.814569 1.641035 -2.386379  
F 1.344205 0.973325 -3.529532  
F 3.142008 1.954210 -2.725130  
F 1.167209 2.889071 -2.454772  
F -3.144368 -1.954873 2.726540

F -1.346628 -0.974657 3.531898  
F -1.169756 -2.890444 2.457177  
H -4.376575 -3.781834 -2.399611  
C -4.371779 -2.813740 -1.890658  
C -3.244063 -2.435518 -1.131245  
C -5.454893 -1.945871 -1.974233  
N -3.168391 -1.261781 -0.487550  
H -2.377313 -3.097957 -1.040390  
C -5.404996 -0.699008 -1.299032  
H -6.346733 -2.210330 -2.553088  
C -4.222403 -0.395851 -0.559368  
C -6.482604 0.254220 -1.329691  
C -4.121944 0.864315 0.147104  
C -6.389779 1.450256 -0.658227  
H -7.382193 0.003679 -1.902507  
N -2.977268 1.110695 0.841564  
C -5.211362 1.785914 0.095278  
H -7.214058 2.171514 -0.685351  
C -2.868285 2.269078 1.500012  
C -5.062377 3.006792 0.804217  
C -3.887751 3.249465 1.507467  
H -1.932233 2.431375 2.047331  
H -5.874226 3.742688 0.788773  
H -3.739868 4.180388 2.063203  
C 4.371458 2.813381 1.891507  
C 5.455641 1.946656 1.973062  
C 3.243246 2.434533 1.133144  
H 4.375809 3.781083 2.401209  
C 5.406288 0.700261 1.296958  
H 6.347925 2.211664 2.550981  
N 3.168043 1.261181 0.488688  
H 2.375698 3.096130 1.043787  
C 6.485145 -0.251617 1.325220  
C 4.223060 0.396316 0.558635  
C 6.392866 -1.447190 0.652858  
H 7.385233 -0.000424 1.896968  
C 4.123051 -0.863512 -0.148498  
C 5.213746 -1.783722 -0.099157  
H 7.218122 -2.167397 0.678126  
N 2.977595 -1.110832 -0.841347  
C 5.065183 -3.004267 -0.808761  
C 2.869045 -2.268856 -1.500500  
C 3.889734 -3.247944 -1.510283  
H 5.877987 -3.739144 -0.795125  
H 1.932317 -2.431949 -2.046425  
H 3.742135 -4.178666 -2.066430

#### TS\_OO

Cu -1.399299 0.427625 0.686845  
Cu 1.443972 -0.583607 -0.712337  
O 0.400729 -0.089456 0.797334  
O -0.362074 -0.077044 -0.828165  
C 1.852171 -1.223672 -2.518711  
C -1.793307 0.979403 2.525953  
F -1.284304 0.123436 3.493905  
F -3.139848 1.098297 2.851572  
F -1.254640 2.224336 2.845250  
F 3.197580 -1.222070 -2.872419  
F 1.231647 -0.515922 -3.539219  
F 1.449689 -2.544314 -2.719898  
H 4.274536 -4.082184 1.778010  
C 4.274313 -3.047914 1.424473  
C 3.155062 -2.554976 0.723502  
C 5.353537 -2.203549 1.651612  
N 3.087082 -1.297374 0.264748  
H 2.286395 -3.190906 0.526791  
C 5.309980 -0.868232 1.176675  
H 6.239068 -2.552425 2.192957  
C 4.137573 -0.450986 0.476280

C 6.386670 0.063759 1.374275  
C 4.050336 0.905086 -0.027052  
C 6.307567 1.348252 0.896207  
H 7.273984 -0.278212 1.916896  
N 2.918348 1.266631 -0.687030  
C 5.143787 1.799985 0.184149  
H 7.132016 2.052592 1.048606  
C 2.829163 2.511478 -1.161300  
C 5.014466 3.114817 -0.333479  
C 3.855021 3.472370 -1.009274  
H 1.901199 2.764368 -1.688011  
H 5.831281 3.830726 -0.193580  
H 3.724207 4.477246 -1.420602  
C -4.084499 3.252811 -1.188256  
C -5.245072 2.521332 -1.406246  
C -2.975982 2.617000 -0.593054  
H -4.013799 4.307326 -1.467436  
C -5.291696 1.154626 -1.031537  
H 5.812582 2.983260 -1.64185  
N -2.993287 1.327100 -0.229514  
H -2.046613 3.162908 -0.402550  
C -6.454221 0.331821 -1.227051  
C -4.122307 0.589502 -0.438530  
C -6.457949 -0.988526 -0.850690  
H -7.338512 0.785931 -1.685811  
C -4.124501 -0.802580 -0.037103  
C -5.299209 -1.587608 -0.247409  
H -7.346893 -1.609814 -1.002214  
N -2.995533 -1.301150 0.533015  
C -5.254081 -2.944733 0.164034  
C -2.986973 -2.582195 0.909950  
C -4.095200 -3.444366 0.744089  
H -6.134447 -3.579695 0.019394  
H -2.059089 -2.947962 1.365380  
H -4.027443 -4.485428 1.071968

#### VI

Cu 1.139594 0.297742 -0.617965  
Cu -1.165631 -0.471131 0.699156  
O -0.483415 -0.431308 -1.036931  
O 0.510515 0.115572 1.128490  
C -1.625737 -0.628265 2.602546  
C 1.515043 0.607742 -2.519950  
F 1.144757 -0.428105 -3.354728  
F 2.843635 0.857378 -2.851984  
F 0.828341 1.721450 -3.000533  
F -2.981165 -0.730766 2.901086  
F -1.181046 0.413914 3.391752  
F -1.064087 -1.771894 3.169557  
H -3.865810 -4.462638 -0.740920  
C -3.920075 -3.375903 -0.632140  
C -2.821712 -2.679608 -0.089090  
C -5.045839 -2.659870 -1.019572  
N -2.825830 -1.348455 0.072062  
H -1.914407 -3.205674 0.222779  
C -5.072148 -1.251032 -0.858214  
H -5.916558 -3.166781 -1.449604  
C -3.921150 -0.618480 -0.293463  
C -6.205388 -0.452144 -1.241003  
C -3.915569 0.819651 -0.102820  
C -6.201067 0.910765 -1.069612  
H -7.073365 -0.960822 -1.674249  
N -2.813054 1.386677 0.525503  
C -5.062817 1.577002 -0.497418  
H -7.067628 1.513770 -1.363087  
C -2.801209 2.709373 0.631596  
C -5.015019 2.981237 -0.292962  
C -3.881026 3.551552 0.272323  
H -1.894211 3.130877 1.083046



H -5.874424 3.596269 -0.582786  
H -3.812037 4.630195 0.444145  
C 3.662805 3.383063 0.775332  
C 4.867887 2.759895 1.075037  
C 2.610235 2.613329 0.240689  
H 3.511935 4.452515 0.946745  
C 5.018828 1.370204 0.834951  
H 5.706321 3.325728 1.495650  
N 2.731965 1.299047 0.005231  
H 1.644168 3.065401 -0.003412  
C 6.238497 0.664521 1.124105  
C 3.906937 0.660690 0.283651  
C 6.352710 -0.682089 0.877512  
H 7.075075 1.230334 1.548156  
C 4.025913 -0.759838 0.014815  
C 5.255278 -1.423915 0.318592  
H 7.283844 -1.214682 1.100913  
N 2.954734 -1.399174 -0.522691  
C 5.326359 -2.814824 0.041836  
C 3.055243 -2.706700 -0.771339  
C 4.223285 -3.460385 -0.503551  
H 6.250586 -3.360902 0.262045  
H 2.170055 -3.188477 -1.205302  
H 4.244492 -4.531235 -0.728340

## VII

Cu -1.433304 -0.544097 -0.606893  
Cu 0.757038 -1.210487 0.949596  
O -1.061432 -1.370838 1.023360  
C 0.919763 -2.075076 2.702630  
C -1.585481 0.176247 -2.429379  
F -0.827362 1.304624 -2.664137  
F -2.863760 0.523880 -2.849984  
F -1.153887 -0.754723 -3.371627  
F 2.176550 -2.578198 3.019255  
F 0.065455 -3.140059 2.895684  
F 0.631678 -1.187243 3.735617  
H 4.747326 1.767070 1.745245  
C 4.446387 0.830308 1.267985  
C 3.116942 0.382343 1.402632  
C 5.339464 0.071776 0.521881  
N 2.684430 -0.757160 0.843226  
H 2.380313 0.955613 1.972861  
C 4.905358 -1.139953 -0.074006  
H 6.377990 0.393420 0.387672  
C 3.545617 -1.534620 0.121362  
C 5.779898 -1.972071 -0.856231  
C 3.073145 -2.783079 -0.445163  
C 5.330501 -3.144876 -1.412808  
H 6.815748 -1.644517 -0.996553  
N 1.786375 -3.145911 -0.204612  
C 3.974078 -3.580144 -1.218714  
H 6.000836 -3.773381 -2.009637  
C 1.343185 -4.293185 -0.722849  
C 3.467533 -4.792299 -1.757731  
C 2.147711 -5.150796 -1.511379  
H 0.299246 -4.552806 -0.506338  
H 4.125306 -5.430161 -2.358755  
H 1.726277 -6.078217 -1.911325  
C -4.848459 -3.001946 -0.871185  
C -5.889762 -2.239737 -0.356261  
C -3.561387 -2.433932 -0.950041  
H -5.003799 -4.028591 -1.214181  
C -5.641541 -0.912163 0.076182  
H -6.903244 -2.648133 -0.278467  
N -3.305914 -1.180456 -0.547913  
H -2.713876 -3.000576 -1.346995  
C -6.675227 -0.071107 0.617528  
C -4.309165 -0.406074 -0.038756

C -6.402735 1.211962 1.024968  
H -7.687469 -0.482160 0.696335  
C -4.017856 0.950126 0.384493  
C -5.074646 1.752206 0.918744  
H -7.194409 1.847840 1.436666  
N -2.744271 1.403106 0.247472  
C -4.746764 3.073880 1.320500  
C -2.470896 2.652144 0.632495  
C -3.441082 3.526754 1.178066  
H -5.528689 3.719395 1.736052  
H -1.433294 2.984452 0.502234  
H -3.154520 4.539999 1.476330  
O 0.375370 -0.241715 -0.612830  
H 0.860851 1.598870 -0.479268  
C 1.244095 2.631437 -0.451357  
C 1.676647 3.781024 -0.416026  
C 2.176139 5.121533 -0.370974  
C 2.743432 5.718264 -1.526049  
C 2.110250 5.873328 0.830227  
C 3.228995 7.031982 -1.475301  
H 2.797432 5.143389 -2.456484  
C 2.598537 7.186335 0.869168  
H 1.673160 5.418579 1.725554  
C 3.158746 7.770486 -0.280711  
H 3.664514 7.481568 -2.374528  
H 2.540858 7.756268 1.803097  
H 3.538701 8.797367 -0.246253

## DPTS1

Cu -1.455567 -0.549124 -0.621104  
Cu 0.770974 -1.092355 0.954315  
O -1.042740 -1.267114 1.050263  
C 0.904724 -1.915052 2.722248  
C -1.698555 -0.031583 -2.504101  
F -0.964537 1.064639 -2.895900  
F -2.995429 0.251212 -2.899965  
F -1.291586 -1.066392 -3.338234  
F 2.155652 -2.413152 3.043967  
F 0.046166 -2.968039 2.916870  
F 0.612839 -1.000564 3.720409  
H 4.745844 1.870115 1.922907  
C 4.449968 0.950367 1.410730  
C 3.116817 0.504096 1.510198  
C 5.351864 0.215545 0.651545  
N 2.692460 -0.615881 0.907276  
H 2.371947 1.060606 2.085630  
C 4.925026 -0.975645 0.010427  
H 6.392328 0.540155 0.541896  
C 3.563206 -1.374070 0.176752  
C 5.806087 -1.784616 -0.788530  
C 3.096203 -2.605432 -0.427765  
C 5.360453 -2.938625 -1.386460  
H 6.843600 -1.454499 -0.908694  
N 1.808017 -2.975288 -0.204034  
C 4.002362 -3.379489 -1.217202  
H 6.035483 -3.548348 -1.997253  
C 1.366915 -4.106391 -0.758488  
C 3.498049 -4.574196 -1.795830  
C 2.176326 -4.938636 -1.568774  
H 0.322183 -4.372581 -0.554984  
H 4.158635 -5.194332 -2.412020  
H 1.756845 -5.852862 -1.999828  
C -4.876790 -3.018627 -0.572260  
C -5.885249 -2.207586 -0.065762  
C -3.588220 -2.477070 -0.751827  
H -5.058730 -4.064690 -0.833531  
C -5.604583 -0.855644 0.258871  
H -6.897578 -2.596907 0.087456  
N -3.306176 -1.200902 -0.453960

H -2.765644 -3.081497 -1.144914  
C -6.599722 0.038198 0.787979  
C -4.275542 -0.377530 0.043184  
C -6.292216 1.343401 1.087355  
H -7.611530 -0.350478 0.946146  
C -3.948037 1.000299 0.351591  
C -4.965659 1.855518 0.876400  
H -7.054490 2.019193 1.490692  
N -2.677451 1.419815 0.118368  
C -4.599304 3.196883 1.164256  
C -2.365755 2.688545 0.395673  
C -3.296338 3.615289 0.923718  
H -5.349495 3.884499 1.570570  
H -1.330117 2.987548 0.190445  
H -2.981382 4.642231 1.133147  
O 0.368737 -0.195446 -0.686856  
H 0.704422 0.999691 -0.667235  
C 1.176952 2.217727 -0.671968  
C 1.625214 3.374277 -0.600251  
C 2.129964 4.711049 -0.489827  
C 2.754229 5.351680 -1.592720  
C 2.016623 5.426318 0.732296  
C 3.245427 6.659278 -1.472988  
H 2.848458 4.811914 -2.541191  
C 2.510317 6.733508 0.842504  
H 1.537206 4.944182 1.591323  
C 3.126480 7.356737 -0.257487  
H 3.724133 7.136984 -2.335344  
H 2.412900 7.268974 1.793779  
H 3.510873 8.378781 -0.168190

## VIII

Cu 1.229604 0.763284 -0.976145  
Cu -1.081734 -1.303830 -0.461872  
O -0.203400 0.232735 0.097726  
O 0.420459 0.080603 -2.504642  
H 0.984290 0.321459 -3.270625  
C 0.473678 -2.268454 -0.172501  
C 1.491923 -2.935573 0.054738  
C 2.674949 -3.695664 0.321441  
C 3.531483 -4.101514 -0.736627  
C 3.018406 -4.063760 1.649921  
C 4.687971 -4.847318 -0.470146  
H 3.277689 -3.825192 -1.765806  
C 4.176549 -4.810844 1.905370  
H 2.366061 -3.758519 2.475435  
C 5.017279 -5.206131 0.849381  
H 5.336197 -5.151296 -1.299953  
H 4.424002 -5.086076 2.936994  
H 5.921697 -5.789907 1.053110  
C -1.927475 -2.967906 -1.169739  
F -1.429026 -3.288958 -2.423247  
F -3.300135 -2.893121 -1.351326  
F -1.754049 -4.101690 -0.400360  
C -2.680265 0.409049 -2.215000  
C -3.677836 0.013855 -0.132840  
C -3.749263 1.237767 -2.616777  
H -1.797939 0.242466 -2.842790  
C -4.791885 0.845162 -0.460277  
C -4.807031 1.454117 -1.741605  
H -3.725744 1.698799 -3.608437  
H -5.651078 2.093233 -2.023536  
C -3.615910 -0.623482 1.166014  
C -4.672702 -0.407557 2.102977  
C -4.559792 -1.049978 3.364059  
C -2.459938 -1.994795 2.630958  
C -3.451128 -1.845233 3.630239  
H -5.348279 -0.911255 4.112236  
H -1.573175 -2.615057 2.810586

H -3.333475 -2.352713 4.592569  
 N -2.658408 -0.188401 -1.016737  
 N -2.537185 -1.404346 1.436176  
 C 2.853346 1.258950 -2.004365  
 F 2.664083 1.504268 -3.360280  
 F 3.783409 0.231168 -1.955254  
 F 3.523300 2.375576 -1.551171  
 C 1.980318 2.545373 1.194740  
 C 2.869953 0.378738 1.354021  
 C 2.571550 2.914858 2.442631  
 C 3.485620 0.670666 2.587373  
 H 2.955594 -0.609105 0.893339  
 C 3.335160 1.939576 3.133037  
 H 4.068403 -0.105890 3.090466  
 H 3.798957 2.200669 4.090472  
 C 1.199625 3.517910 0.454912  
 C 1.028904 4.829718 0.997169  
 C 0.253465 5.747136 0.239857  
 C -0.056720 4.021404 -1.421113  
 C -0.293930 5.342786 -0.971711  
 H 0.097629 6.762584 0.620965  
 H -0.471546 3.675038 -2.375961  
 H -0.897791 6.024503 -1.578566  
 N 0.666955 3.135572 -0.733970  
 N 2.145068 1.288071 0.689115  
 C -5.783360 0.431671 1.741757  
 C -5.839654 1.034485 0.507766  
 H -6.584826 0.582260 2.473517  
 H -6.686369 1.674264 0.235839  
 C 2.378464 4.246859 2.950516  
 C 1.634689 5.169615 2.256037  
 H 2.841866 4.506116 3.908579  
 H 1.491209 6.182364 2.648756

IX

Cu -1.338923 -1.225265 -1.108892  
 Cu -1.051629 1.832706 -0.387178  
 O -1.689482 -0.052013 -2.501950  
 H -2.144587 -0.550516 -3.214038  
 C -2.673030 1.293383 0.330813  
 C -3.757722 0.958073 0.824402  
 C -5.003997 0.546367 1.395469  
 C -6.106684 0.209128 0.566047  
 C -5.166126 0.466737 2.804451  
 C -7.325276 -0.192072 1.130709  
 H -5.994582 0.266234 -0.522162  
 C -6.389258 0.064801 3.358854  
 H -4.323476 0.724684 3.455319  
 H -7.474145 -0.266378 2.527347  
 H -8.165050 -0.448036 0.474693  
 H -6.495591 0.010684 4.448319  
 H -8.428629 -0.579951 2.964183  
 C -1.858689 3.635898 -0.647667  
 F -2.799931 3.633903 -1.661735  
 F -0.953195 4.618547 -1.012620  
 F -2.496077 4.159754 0.457062  
 C 0.605090 2.066945 -2.793978  
 C 1.634732 2.910251 -0.867120  
 C 1.730400 2.384204 -3.583984  
 H -0.274059 1.557738 -3.203735  
 C 2.813136 3.256879 -1.594476  
 C 2.833406 2.982171 -2.986182  
 H 1.716525 2.151672 -4.652731  
 H 3.722653 3.240005 -3.572049  
 C 1.570442 3.162674 0.557172  
 C 2.690609 3.757786 1.213566  
 C 2.578859 3.974407 2.612394  
 C 0.360212 3.019573 2.525900  
 C 1.412272 3.603317 3.271224

H 3.414651 4.429777 3.155359  
 H -0.572591 2.716800 3.017241  
 H 1.295773 3.754455 4.348748  
 N 0.562641 2.333130 -1.482214  
 N 0.433690 2.805676 1.210173  
 C -2.464471 -2.611617 -1.969020  
 F -2.496786 -2.576863 -3.357978  
 F -3.783176 -2.462066 -1.572766  
 F -2.140056 -3.916344 -1.670091  
 C -0.010933 -3.200431 0.557857  
 C -1.971600 -2.303166 1.486637  
 C 0.234591 -3.971198 1.736366  
 C -1.801761 -3.041133 2.675082  
 H -2.818356 -1.625023 1.350847  
 C -0.695913 -3.872592 2.801837  
 H -2.541081 -2.942961 3.474880  
 H -0.530094 -4.455597 3.714327  
 C 0.912790 -3.282574 -0.556342  
 C 2.053583 -4.137291 -0.454721  
 C 2.929667 -4.183532 -1.570940  
 C 1.492476 -2.596756 -2.689031  
 C 2.649776 -3.411935 -2.692464  
 H 3.816273 -4.826270 -1.532013  
 H 1.245661 -1.974191 -3.558005  
 H 3.305939 -3.423013 -3.568252  
 N 0.648854 -2.532835 -1.657241  
 N -1.102971 -2.384654 0.470121  
 C 3.861606 4.101184 0.452360  
 C 3.919819 3.858931 -0.899443  
 H 4.708963 4.558984 0.974775  
 H 4.814175 4.118313 -1.476553  
 C 1.398160 -4.814519 1.800597  
 C 2.274732 -4.895842 0.746007  
 H 1.566456 -5.392510 2.715728  
 H 3.158369 -5.541379 0.801528  
 O -0.399263 0.097314 -0.170071  
 H 1.389999 -0.120351 0.256963  
 C 2.442503 -0.285702 0.543206  
 C 3.617369 -0.473932 0.849769  
 C 4.987012 -0.700410 1.198161  
 C 5.340682 -1.099723 2.512403  
 C 6.010640 -0.534191 0.230247  
 C 6.683517 -1.325738 2.843880  
 H 4.555086 -1.229255 3.264350  
 C 7.350023 -0.763644 0.572716  
 H 5.743561 -0.226253 -0.786293  
 C 7.691893 -1.159846 1.877950  
 H 6.943861 -1.633332 3.862727  
 H 8.131109 -0.632907 -0.184435  
 H 8.740134 -1.338526 2.141414

DPTS2

Cu 1.158763 1.284343 -1.094604  
 Cu 0.949319 -1.836859 -0.456950  
 O 1.346059 0.170244 -2.560892  
 H 1.754277 0.675273 -3.296351  
 C 2.623008 -1.318443 0.164655  
 C 3.733078 -1.004509 0.612497  
 C 5.002308 -0.613630 1.147205  
 C 6.076945 -0.262109 0.288268  
 C 5.212531 -0.571685 2.551206  
 C 7.316980 0.117247 0.820517  
 H 5.926494 -0.290503 -0.796363  
 C 6.456605 -0.191255 3.072919  
 H 4.390997 -0.841849 3.223615  
 C 7.513911 0.154891 2.212555  
 H 8.135510 0.384943 0.142840  
 H 6.601422 -0.165989 4.158937  
 H 8.484900 0.451812 2.623905

C 1.791519 -3.594891 -0.871849  
 F 2.638394 -3.492273 -1.954785  
 F 0.880134 -4.570940 -1.221492  
 F 2.521386 -4.155161 0.146342  
 C -0.928723 -2.011509 -3.265986  
 C -1.710586 -3.013236 -0.716217  
 C -2.104872 -2.364947 -3.380147  
 H -0.125742 -1.428959 -3.150699  
 C -2.930326 -3.402785 -1.346695  
 C -3.103169 -3.065511 -2.713651  
 H -2.210847 -2.080190 -4.430844  
 H -4.027299 -3.354750 -3.226299  
 C -1.493556 -3.321037 0.680743  
 C -2.507499 -4.011446 1.411245  
 C -2.247081 -4.278057 2.781235  
 C -0.105177 -3.186010 2.529079  
 C -1.044552 -3.863511 3.342544  
 H -2.998244 -4.805217 3.379963  
 H 0.853066 -2.847475 2.941497  
 H -0.814975 -4.051442 4.395781  
 N -0.740697 -2.340982 -1.401366  
 N -0.320660 -2.921533 1.238316  
 C 2.278628 2.647343 -1.980020  
 F 2.146344 2.707885 -3.356941  
 F 3.611116 2.374064 -1.745962  
 F 2.083300 3.938149 -1.556036  
 C 0.061305 3.284182 0.700114  
 C 1.997110 2.214213 1.491350  
 C -0.044541 4.052453 1.900247  
 C 1.958862 2.938354 2.699408  
 H 2.777785 1.475348 1.291743  
 C 0.937574 3.857810 2.904403  
 H 2.733604 2.763124 3.450884  
 H 0.878088 4.436480 3.832585  
 C -0.918689 3.456295 -0.352612  
 C -1.978823 4.395771 -0.169254  
 C -2.915645 4.527608 -1.228108  
 C -1.675780 2.855058 -2.454163  
 C -2.763626 3.757350 -2.374930  
 H -3.746186 5.235315 -1.127753  
 H -1.531880 2.231620 -3.345200  
 H -3.468411 3.834159 -3.208578  
 N -0.780559 2.705217 -1.475942  
 N 1.077803 2.388637 0.532218  
 C -3.723911 -4.396500 0.747438  
 C -3.926348 -4.103301 -0.580120  
 H -4.489202 -4.927281 1.324546  
 H -4.855252 -4.394160 -1.082754  
 C -1.128245 4.986738 2.045870  
 C -2.060046 5.153346 1.049990  
 H -1.190838 5.563997 2.974616  
 H -2.882705 5.867298 1.168216  
 O 0.292895 -0.095564 -0.112117  
 H -0.923851 0.022986 0.115791  
 C -2.161513 0.204610 0.449521  
 C -3.348341 0.424177 0.739450  
 C -4.721533 0.678842 1.061496  
 C -5.097441 1.104472 2.363045  
 C -5.737730 0.517071 0.082576  
 C -6.441687 1.358104 2.669430  
 H -4.323837 1.232806 3.127995  
 C -7.079126 0.774144 0.397792  
 H -5.460951 0.189846 -0.925668  
 C -7.438439 1.195529 1.690651  
 H -6.712690 1.685047 3.679774  
 H -7.848876 0.645145 -0.371629  
 H -8.487778 1.395842 1.933691

|      |           |           |           |           |           |           |           |           |           |           |           |
|------|-----------|-----------|-----------|-----------|-----------|-----------|-----------|-----------|-----------|-----------|-----------|
| X    |           | H         | -3.755369 | -4.274687 | -0.452389 | H         | -0.768314 | -3.170306 | 0.122319  |           |           |
| Cu   | 0.088090  | -0.495975 | -0.226170 | H         | -5.620921 | -2.580842 | -0.300299 | F         | -3.256217 | -0.016613 | 0.106744  |
| C    | 1.921097  | -0.217123 | -0.239223 | C         | -2.501586 | 0.876451  | -0.265418 | Met_TS    |           |           |           |
| C    | 3.149911  | -0.079842 | -0.286188 | C         | -3.521986 | 1.872813  | -0.196841 | Cu        | 0.479185  | -0.374642 | -0.197756 |
| C    | 4.571816  | 0.077762  | -0.346847 | C         | -3.102833 | 3.228561  | -0.163287 | N         | -0.755084 | 1.182242  | -0.115399 |
| C    | 5.358703  | -0.004789 | 0.831887  | C         | -0.811905 | 2.463609  | -0.248310 | N         | -1.397748 | -1.471526 | -0.133891 |
| C    | 5.222452  | 0.314583  | -1.586027 | C         | -1.745033 | 3.525583  | -0.192794 | C         | -0.433184 | 2.486911  | -0.073359 |
| C    | 6.751141  | 0.141210  | 0.767193  | H         | -3.855093 | 4.023928  | -0.116203 | C         | -1.397412 | 3.511703  | 0.025280  |
| H    | 4.866241  | -0.186869 | 1.793136  | H         | 0.265999  | 2.665188  | -0.265785 | C         | -2.745380 | 3.175354  | 0.074351  |
| C    | 6.615309  | 0.460905  | -1.639654 | H         | -1.389227 | 4.560039  | -0.171051 | C         | -4.493283 | 1.375369  | 0.070675  |
| H    | 4.624517  | 0.380340  | -2.501342 | N         | -1.882166 | -1.454051 | -0.405434 | C         | -4.818351 | 0.040755  | 0.022492  |
| C    | 7.385440  | 0.374320  | -0.466074 | N         | -1.174402 | 1.177945  | -0.282389 | C         | -4.072252 | -2.356764 | -0.098905 |
| H    | 7.344127  | 0.072374  | 1.686112  | O         | 0.123381  | -1.091793 | -2.439772 | C         | -3.020417 | -3.263839 | -0.162203 |
| H    | 7.102827  | 0.642257  | -2.604163 | H         | 1.063725  | -0.947896 | -2.680135 | C         | -1.693428 | -2.776136 | -0.174308 |
| H    | 8.474112  | 0.487804  | -0.512367 | C         | -4.903755 | 1.474396  | -0.167348 | C         | -2.080934 | 0.835907  | -0.055937 |
| C    | 0.190385  | -0.530819 | 1.745672  | C         | -5.256236 | 0.146285  | -0.205477 | C         | -3.121526 | 1.807861  | 0.032055  |
| F    | 0.834554  | 0.541039  | 2.310271  | H         | -5.670736 | 2.255029  | -0.113226 | C         | -3.793389 | -0.965193 | -0.056700 |
| F    | 0.840400  | -1.660875 | 2.193797  | H         | -6.309463 | -0.153940 | -0.180472 | C         | -2.421806 | -0.571579 | -0.085261 |
| F    | -1.046521 | -0.560514 | 2.354192  | XI        |           |           | H         | 0.633368  | 2.725185  | -0.126273 |           |
| C    | -1.922867 | -2.589103 | -0.375392 | Cu        | -1.471634 | -0.441847 | 0.074136  | H         | -1.069280 | 4.554793  | 0.054929  |
| C    | -2.833535 | -0.431677 | -0.309070 | N         | 0.184425  | 1.375357  | 0.030479  | H         | -3.520469 | 3.946499  | 0.143506  |
| C    | -3.197391 | -3.170225 | -0.537196 | N         | 0.194652  | -1.375511 | 0.038260  | H         | -5.275498 | 2.139611  | 0.136378  |
| H    | -1.018208 | -3.202971 | -0.335618 | C         | 0.168130  | 2.711588  | 0.031141  | H         | -5.865228 | -0.281280 | 0.047729  |
| C    | -4.157844 | -0.940590 | -0.472066 | C         | 1.339263  | 3.504575  | -0.000962 | H         | -5.112917 | -2.698705 | -0.079101 |
| C    | -4.315057 | -2.345697 | -0.586580 | C         | 2.575499  | 2.869155  | -0.035517 | H         | -3.201397 | -4.342439 | -0.194809 |
| H    | -3.283900 | -4.257012 | -0.621743 | C         | 3.870415  | 0.720738  | -0.070166 | H         | -0.842792 | -3.466368 | -0.212319 |
| H    | -5.319030 | -2.765376 | -0.712978 | C         | 3.874622  | -0.652804 | -0.068918 | F         | 1.923822  | -1.501681 | -1.059974 |
| C    | -2.621320 | 0.995412  | -0.187022 | C         | 2.625475  | -2.819034 | -0.029883 | Si        | 3.088303  | 0.100777  | -0.670271 |
| C    | -3.746197 | 1.874197  | -0.229694 | C         | 1.402433  | -3.480127 | 0.008510  | C         | 4.622902  | -1.037163 | -0.852165 |
| C    | -3.483785 | 3.264106  | -0.103205 | C         | 0.214342  | -2.727139 | 0.042040  | C         | 2.412688  | 0.830195  | -2.332006 |
| C    | -1.130326 | 2.745014  | 0.083275  | C         | 1.388998  | 0.742836  | -0.002073 | C         | 2.191214  | -0.297500 | 1.264782  |
| C    | -2.173478 | 3.701389  | 0.052649  | C         | 2.632447  | 1.450978  | -0.036525 | C         | 3.802547  | 1.761552  | 0.084836  |
| H    | -4.317149 | 3.975110  | -0.129952 | C         | 2.645685  | -1.400989 | -0.033090 | H         | 5.560068  | -0.453279 | -0.804972 |
| H    | -0.086712 | 3.058998  | 0.205546  | C         | 1.396811  | -0.706881 | 0.000973  | H         | 4.652303  | -1.795947 | -0.050522 |
| H    | -1.937619 | 4.765331  | 0.151698  | H         | -0.821993 | 3.184432  | 0.058638  | H         | 4.589074  | -1.573286 | -1.817195 |
| N    | -1.755144 | -1.264928 | -0.265491 | H         | 1.260567  | 4.596238  | 0.001490  | H         | 2.159510  | 0.049904  | -3.068339 |
| N    | -1.344883 | 1.432550  | -0.033212 | H         | 3.507544  | 3.444947  | -0.061447 | H         | 3.193481  | 1.487739  | -2.761432 |
| O    | 0.077807  | -0.569976 | -2.103255 | H         | 4.810165  | 1.283728  | -0.097452 | H         | 1.516825  | 1.456000  | -2.168130 |
| H    | 0.993893  | -0.355201 | -2.385077 | H         | 4.817421  | -1.210285 | -0.095426 | F         | 1.603376  | 0.776568  | 1.922994  |
| C    | -5.068018 | 1.331889  | -0.395981 | H         | 3.570112  | -3.372952 | -0.056967 | F         | 3.372265  | -0.510629 | -0.803653 |
| C    | -5.265445 | -0.023213 | -0.513696 | H         | 1.343303  | -4.572430 | 0.012799  | F         | 1.435774  | -1.424214 | 1.662267  |
| H    | -5.916540 | 2.243310  | -0.426873 | H         | -0.760700 | -3.221071 | 0.072790  | H         | 4.514690  | 2.183585  | -0.651555 |
| H    | -6.273080 | -0.433462 | -0.640772 | O         | -3.233798 | 0.080105  | 0.127123  | H         | 3.013991  | 2.519553  | 0.247863  |
| RETS |           |           | H         | -3.231436 | 1.061525  | 0.125086  | H         | 4.346422  | 1.622170  | 1.035756  |           |
| Cu   | 0.041518  | -0.773140 | -0.555076 | II'       |           |           | OA'       |           |           |           |           |
| C    | 1.778532  | -0.378133 | -0.199577 | Cu        | -1.357769 | -0.023423 | 0.096146  | Cu        | -0.643696 | -0.325944 | -0.596038 |
| C    | 2.978410  | -0.043645 | -0.212855 | N         | 0.207692  | 1.341548  | 0.068340  | N         | 0.586909  | 1.280419  | -0.202122 |
| C    | 4.345373  | 0.342588  | -0.259362 | N         | 0.227249  | -1.350187 | 0.068575  | N         | 1.182308  | -1.372897 | -0.307062 |
| C    | 5.377687  | -0.635343 | -0.220287 | C         | 0.176369  | 2.683670  | 0.074951  | C         | 0.292449  | 2.588212  | -0.116255 |
| C    | 4.706940  | 1.716326  | -0.338043 | C         | 1.342543  | 3.479433  | 0.024562  | C         | 1.260480  | 3.584930  | 0.128301  |
| C    | 6.722130  | -0.245936 | -0.256488 | C         | 2.587854  | 2.861730  | -0.034276 | C         | 2.591749  | 3.217200  | 0.278006  |
| H    | 5.109301  | -1.695410 | -0.161808 | C         | 3.896697  | 0.710787  | -0.095349 | C         | 4.298137  | 1.379803  | 0.329185  |
| C    | 6.055425  | 2.091460  | -0.373744 | C         | 3.906690  | -0.664638 | -0.095757 | C         | 4.601694  | 0.042207  | 0.241146  |
| H    | 3.919139  | 2.476392  | -0.371080 | C         | 2.630041  | -2.834752 | -0.035719 | C         | 3.820226  | -2.328211 | -0.070171 |
| C    | 7.068293  | 1.115644  | -0.333144 | C         | 1.394060  | -3.470895 | 0.023229  | C         | 2.759417  | -3.202169 | -0.281697 |
| H    | 7.506138  | -1.010808 | -0.225238 | C         | 0.216112  | -2.692993 | 0.074555  | C         | 1.450744  | -2.681115 | -0.394962 |
| H    | 6.318262  | 3.153476  | -0.434537 | C         | 1.427751  | 0.727082  | 0.012617  | C         | 1.895514  | 0.903991  | -0.034034 |
| H    | 8.121705  | 1.414664  | -0.362441 | C         | 2.659133  | 1.443940  | -0.040012 | C         | 2.943264  | 1.845477  | 0.195882  |
| C    | 0.830982  | -0.645977 | 1.490926  | C         | 2.680059  | -1.416039 | -0.040720 | C         | 3.568658  | -0.934253 | 0.023146  |
| F    | 1.158325  | 0.532269  | 2.097804  | C         | 1.438347  | -0.717366 | 0.012563  | C         | 2.214345  | -0.504367 | -0.109211 |
| F    | 1.631783  | -1.629328 | 2.002874  | H         | -0.815294 | 3.146086  | 0.122309  | H         | -0.755598 | 2.867732  | -0.255250 |
| F    | -0.429843 | -0.947187 | 2.024061  | H         | 1.250103  | 4.569691  | 0.032318  | H         | 0.947265  | 4.631447  | 0.185155  |
| C    | -2.209173 | -2.752229 | -0.455405 | H         | 3.510524  | 3.451003  | -0.074894 | H         | 3.371639  | 3.965763  | 0.455040  |
| C    | -2.875402 | -0.521443 | -0.319897 | H         | 4.834888  | 1.275110  | -0.138291 | H         | 5.085633  | 2.122102  | 0.499058  |
| C    | -3.546701 | -3.201642 | -0.415479 | H         | 4.852918  | -1.215296 | -0.139208 | H         | 5.636414  | -0.304256 | 0.338709  |
| H    | -1.378359 | -3.461078 | -0.529670 | H         | 3.561343  | -3.410256 | -0.076945 | H         | 4.846980  | -2.698444 | 0.024633  |
| C    | -4.255337 | -0.884459 | -0.284387 | H         | 1.317821  | -4.562405 | 0.030493  | H         | 2.919655  | -4.281652 | -0.358747 |
| C    | -4.571779 | -2.266794 | -0.330463 |           |           |           |           |           |           |           |           |

|      |           |           |           |                    |           |           |           |                      |           |           |           |
|------|-----------|-----------|-----------|--------------------|-----------|-----------|-----------|----------------------|-----------|-----------|-----------|
| H    | 0.593645  | -3.342823 | -0.561138 | C                  | 3.262674  | 2.848098  | -0.252739 | H                    | 5.626065  | 2.181367  | -0.921674 |
| C    | -1.861946 | -0.897814 | 1.288218  | C                  | 4.553887  | 0.692187  | -0.302597 | H                    | 5.966459  | -0.791168 | -1.921824 |
| F    | -0.772097 | -0.595836 | 2.097663  | C                  | 4.557097  | -0.682542 | -0.299495 | H                    | 4.407503  | -1.329375 | -1.231378 |
| F    | -1.803758 | -2.264908 | 1.070990  | C                  | 3.276274  | -2.844373 | -0.241205 | H                    | 5.921631  | -2.146515 | -0.751394 |
| F    | -2.941365 | -0.761597 | 1.034382  | C                  | 2.044006  | -3.485112 | -0.186833 | F                    | 1.450216  | -1.435128 | 0.239473  |
| F    | -1.426124 | -1.385865 | -2.055154 | C                  | 0.867210  | -2.702871 | -0.136082 | F                    | 1.784186  | 0.106353  | -1.533673 |
| Si   | -2.883981 | 0.576656  | -0.298620 | C                  | 2.078369  | 0.723942  | -0.199361 | F                    | 1.415735  | 0.885447  | 0.688214  |
| C    | -2.642861 | 1.440495  | -2.014997 | C                  | 3.319212  | 1.429577  | -0.253263 | H                    | 3.861053  | -0.728072 | 1.974900  |
| H    | -3.407650 | 2.241473  | -2.069170 | C                  | 3.325900  | -1.425610 | -0.247725 | H                    | 5.407507  | -1.541297 | 2.347379  |
| H    | -1.653669 | 1.899221  | -2.173292 | C                  | 2.081621  | -0.725767 | -0.197459 | H                    | 5.128010  | 0.144132  | 2.885175  |
| H    | -2.823092 | 0.713920  | -2.822851 | H                  | -0.133423 | 3.167723  | -0.094983 |                      |           |           |           |
| C    | -3.115678 | 1.939725  | 1.034382  | H                  | 1.948165  | 4.574377  | -0.197674 | CF <sub>3</sub> -DMF |           |           |           |
| H    | -2.203888 | 2.102248  | 1.634429  | H                  | 4.193326  | 3.425041  | -0.293801 | O                    | 0.104869  | -1.847617 | -0.714699 |
| H    | -3.375060 | 2.895135  | 0.543214  | H                  | 5.494385  | 1.252974  | -0.342167 | N                    | -1.480803 | -0.104062 | -0.348092 |
| H    | -3.932924 | 1.675879  | 1.727404  | H                  | 5.500209  | -1.239080 | -0.336448 | C                    | -1.917101 | -0.686334 | 0.904439  |
| C    | -4.401206 | -0.565914 | -0.497142 | H                  | 4.209789  | -3.416946 | -0.278441 | H                    | -1.606556 | -0.118063 | 1.817019  |
| H    | -5.209839 | 0.013883  | -0.982042 | H                  | 1.970078  | -4.576713 | -0.180663 | H                    | -3.023113 | -0.773277 | 0.938747  |
| H    | -4.159755 | -1.417950 | -1.155801 | H                  | -0.118576 | -3.179891 | -0.089190 | H                    | -1.470054 | -1.696101 | 0.945891  |
| H    | -4.781183 | -0.952449 | 0.462045  | C                  | -1.223420 | 0.003458  | 1.838254  | C                    | -1.833730 | 1.293184  | -0.491245 |
|      |           |           |           | F                  | -1.870686 | 1.123274  | 2.366736  | H                    | -1.463195 | 1.964961  | 0.321605  |
| III' |           |           |           | F                  | -0.000887 | -0.009082 | 2.531416  | H                    | -1.430492 | 1.679952  | -1.447128 |
| Cu   | -0.908925 | -0.075231 | -0.210343 | F                  | -1.905811 | -1.082803 | 2.389037  | H                    | -2.937444 | 1.410712  | -0.521259 |
| N    | 0.851291  | 1.362947  | -0.102652 | F                  | -1.264678 | -0.000278 | -1.934314 | C                    | -0.077127 | -0.557307 | -0.773192 |
| N    | 0.893698  | -1.364817 | -0.123481 | Si                 | -3.205996 | -0.003373 | -0.847286 | H                    | 0.022616  | -0.033476 | -1.798011 |
| C    | 0.814313  | 2.698914  | -0.091102 | C                  | -3.579860 | 1.646378  | -1.734243 | C                    | 1.021117  | 0.186457  | 0.073154  |
| C    | 1.978299  | 3.502054  | -0.112635 | H                  | -4.676005 | 1.801629  | -1.749910 | F                    | 2.285058  | -0.135587 | -0.365799 |
| C    | 3.222190  | 2.882873  | -0.145624 | H                  | -3.133527 | 2.500543  | -1.194082 | F                    | 0.988874  | -0.141886 | 1.404973  |
| C    | 4.541610  | 0.744138  | -0.189711 | H                  | -3.205286 | 1.655671  | -2.770772 | F                    | 0.978952  | 1.572880  | 0.029540  |
| C    | 4.562185  | -0.630376 | -0.198662 | C                  | -4.363893 | -0.056052 | 0.697767  |                      |           |           |           |
| C    | 3.309696  | -2.808681 | -0.183765 | H                  | -4.214882 | 0.796615  | 1.379277  | IV'                  |           |           |           |
| C    | 2.085902  | -3.467044 | -0.160991 | H                  | -5.399197 | -0.004478 | 0.302228  | Cu                   | -0.023837 | 0.678747  | -0.455114 |
| C    | 0.897463  | -2.701791 | -0.130614 | H                  | -4.262405 | -0.994235 | 1.267037  | N                    | 1.364000  | -0.879436 | -1.042598 |
| C    | 2.063624  | 0.744052  | -0.136133 | C                  | -3.595829 | -1.592386 | -1.834884 | N                    | 1.434108  | 0.721619  | 1.135084  |
| C    | 3.296800  | 1.465220  | -0.157945 | H                  | -4.690308 | -1.759249 | -1.828881 | C                    | 1.314704  | -1.676252 | -2.122330 |
| C    | 3.339933  | -1.389423 | -0.176978 | H                  | -3.251408 | -1.526757 | -2.879868 | C                    | 2.285515  | -2.661197 | -2.404282 |
| C    | 2.085777  | -0.705944 | -0.146771 | H                  | -3.124410 | -2.476345 | -1.368806 | C                    | 3.357963  | -2.827260 | -1.531156 |
| H    | -0.180515 | 3.158625  | -0.064023 |                    |           |           |           | C                    | 4.518318  | -2.099566 | 0.575942  |
| H    | 1.885389  | 4.592190  | -0.102664 | TS_CF <sub>3</sub> |           |           |           | C                    | 4.559250  | -1.278654 | 1.678012  |
| H    | 4.146206  | 3.471567  | -0.162181 | Cu                 | -0.616331 | 0.072197  | -1.020317 | C                    | 3.525052  | 0.564907  | 3.036556  |
| H    | 5.475551  | 1.316935  | -0.206490 | N                  | -2.033720 | 1.409119  | -0.574014 | C                    | 2.486305  | 1.480658  | 3.183417  |
| H    | 5.512631  | -1.174937 | -0.222589 | N                  | -1.977553 | -1.331050 | -0.631325 | C                    | 1.464129  | 1.524888  | 2.211633  |
| H    | 4.251643  | -3.368028 | -0.206574 | C                  | -2.063429 | 2.760465  | -0.545694 | C                    | 2.413377  | -1.036969 | -0.179309 |
| H    | 2.026792  | -4.559515 | -0.165076 | C                  | -3.122559 | 3.498747  | 0.004489  | C                    | 3.447169  | -2.003456 | -0.380775 |
| H    | -0.082685 | -3.191870 | -0.111527 | C                  | -4.215370 | 2.818716  | 0.568317  | C                    | 3.530691  | -0.299374 | 1.912598  |
| C    | -1.261784 | -0.058682 | 1.680558  | C                  | -5.287892 | 0.625533  | 1.141791  | C                    | 2.453139  | -0.178702 | 0.981679  |
| F    | -1.881427 | 1.075495  | 2.196514  | C                  | -5.242674 | -0.748596 | 1.144062  | H                    | 0.460396  | -1.527011 | -2.792588 |
| F    | -0.046031 | -0.098553 | 2.367017  | C                  | -4.040951 | -2.872514 | 0.562066  | H                    | 2.181849  | -3.279738 | -3.301308 |
| F    | -1.964466 | -1.132901 | 2.214447  | C                  | -2.914488 | -3.483530 | -0.015595 | H                    | 4.129380  | -3.582651 | -1.718617 |
| F    | -0.915078 | -0.073845 | -2.100580 | C                  | -1.918824 | -2.683732 | -0.595165 | H                    | 5.305009  | -2.843448 | 0.405671  |
| Si   | -3.265939 | 0.033831  | -0.664562 | C                  | -3.111256 | 0.721074  | -0.025656 | H                    | 5.379031  | -1.356217 | 2.401237  |
| C    | -3.468857 | 1.708673  | -1.564991 | C                  | -4.223122 | 1.405648  | 0.565844  | H                    | 4.333701  | 0.502846  | 3.773432  |
| H    | -4.515716 | 1.795367  | -1.918010 | C                  | -4.134416 | -1.461783 | 0.561749  | H                    | 2.447403  | 2.162583  | 4.038720  |
| H    | -3.272172 | 2.554821  | -0.883055 | C                  | -3.073471 | -0.710373 | -0.040148 | H                    | 0.634206  | 2.234107  | 2.307039  |
| H    | -2.798364 | 1.790112  | -2.435427 | H                  | -1.198573 | 3.267571  | -0.987517 | C                    | 0.239070  | 2.304536  | -1.589239 |
| C    | -4.488829 | -0.011249 | 0.809561  | H                  | -3.081834 | 4.592310  | -0.011425 | F                    | 1.095378  | 2.199062  | -2.730139 |
| H    | -4.337993 | 0.819993  | 1.516696  | H                  | -5.054538 | 3.365155  | 1.012802  | F                    | 0.779033  | 3.460948  | -0.943521 |
| H    | -5.505350 | 0.088711  | 0.378493  | H                  | -6.135521 | 1.155193  | 1.592036  | F                    | -0.941708 | 2.849084  | -2.185192 |
| H    | -4.448269 | -0.964078 | 1.362073  | H                  | -6.053095 | -1.330607 | 1.598233  | C                    | -1.780045 | 0.066201  | -0.033067 |
| C    | -3.624345 | -1.494727 | -1.756366 | H                  | -4.840809 | -3.469717 | 1.013504  | C                    | -2.979904 | -0.242586 | 0.166621  |
| H    | -4.704482 | -1.499741 | -2.003942 | H                  | -2.807434 | -4.572635 | -0.033790 | C                    | -4.349787 | -0.572686 | 0.406720  |
| H    | -3.046489 | -1.475720 | -2.693640 | H                  | -1.042022 | -3.137928 | -1.069369 | C                    | -5.079546 | 0.053252  | 1.458333  |
| H    | -3.399958 | -2.433097 | -1.218876 | F                  | 7.365323  | 0.185297  | 0.695318  | C                    | -5.035645 | -1.530716 | -0.393954 |
|      |           |           |           | Si                 | 5.665592  | 0.061651  | 0.427193  | C                    | -6.423353 | -0.265918 | 1.694185  |
| RE'  |           |           |           | C                  | 5.108294  | 1.820245  | -0.014961 | H                    | -4.573234 | 0.795166  | 2.086003  |
| Cu   | -0.897527 | -0.007818 | -0.052711 | C                  | 5.477565  | -1.167244 | -1.005277 | C                    | -6.380319 | -1.843392 | -0.150955 |
| N    | 0.873632  | 1.358070  | -0.142028 | C                  | 1.652387  | -0.148485 | -0.179424 | H                    | -4.496867 | -2.024845 | -1.210380 |
| N    | 0.879630  | -1.365449 | -0.140634 | C                  | 4.952165  | -0.574875 | 2.065075  | C                    | -7.084708 | -1.215559 | 0.893374  |
| C    | 0.854575  | 2.695390  | -0.142574 | H                  | 4.021039  | 1.840381  | -0.212887 | H                    | -6.959760 | 0.232507  | 2.510281  |
| C    | 2.027412  | 3.483132  | -0.199141 | H                  | 5.317897  | 2.524427  | 0.810249  | H                    | -6.883730 | -2.583876 | -0.783693 |

|    |           |           |           |   |           |           |           |   |           |           |           |
|----|-----------|-----------|-----------|---|-----------|-----------|-----------|---|-----------|-----------|-----------|
| H  | -8.135443 | -1.463154 | 1.080779  | C | -2.472208 | 1.154271  | -0.248332 | C | 5.466989  | -0.987943 | -0.506747 |
|    |           |           |           | C | -3.491071 | 2.149293  | -0.396658 | C | 6.461128  | 1.638847  | -0.453455 |
| V' |           |           |           | C | -4.195834 | -0.617950 | -0.471064 | H | 4.394625  | 2.260379  | -0.228989 |
| Cu | 0.062087  | -0.608415 | 0.042944  | C | -2.835929 | -0.244503 | -0.256914 | C | 6.844564  | -0.753910 | -0.618990 |
| O  | -0.067334 | -1.114748 | -1.923414 | H | 0.277747  | 2.956695  | -0.024025 | H | 5.079531  | -2.012388 | -0.529267 |
| O  | -0.197140 | -2.437922 | -2.063697 | H | -1.374454 | 4.845489  | -0.220318 | C | 7.350806  | 0.558292  | -0.593840 |
| N  | -1.149494 | 1.460675  | -0.124471 | H | -3.824764 | 4.300744  | -0.480625 | H | 6.843431  | 2.665895  | -0.432249 |
| N  | -1.853603 | -1.175805 | -0.076119 | H | -5.626316 | 2.517534  | -0.673453 | H | 7.528231  | -1.603719 | -0.728169 |
| C  | -0.795218 | 2.748083  | -0.120259 | H | -6.233357 | 0.100303  | -0.763599 | H | 8.428029  | 0.737224  | -0.682750 |
| C  | -1.726177 | 3.809201  | -0.235958 | H | -5.528358 | -2.332466 | -0.708474 | C | 0.098886  | -0.481056 | 2.064105  |
| C  | -3.075803 | 3.507093  | -0.377691 | H | -3.664636 | -4.012136 | -0.458061 | F | 0.711435  | -1.595035 | 2.664491  |
| C  | -4.857568 | 1.743808  | -0.567417 | H | -1.332168 | -3.187820 | 0.019095  | F | 0.797099  | 0.608098  | 2.595187  |
| C  | -5.192021 | 0.407245  | -0.612446 | C | 1.921157  | -0.333542 | -0.170783 | F | -1.141022 | -0.410279 | 2.715181  |
| C  | -4.493880 | -2.011081 | -0.544292 | C | 3.147892  | -0.137622 | -0.251397 |   |           |           |           |
| C  | -3.468069 | -2.936557 | -0.406283 | C | 4.555870  | 0.094073  | -0.363923 |   |           |           |           |
| C  | -2.148805 | -2.485568 | -0.163469 | C | 5.082257  | 1.414611  | -0.338724 |   |           |           |           |
